# Supplementary material for: Statistically significant but clinically unimportant: a systematic review and meta-analysis of the analgesic benefits of erector spinae plane block following breast cancer surgery
Source: HighWire-hosted journal article supplement (doi:10.1136/rapm-2020-101917), 2020-11-09
Supplement: rapm-2020-101917supp001_data_supplement.pdf [file rapm-2020-101917supp001_data_supplement.pdf]

## **Appendix A – Search Strategy**

### **EMBASE**

(breast OR mastectomy OR lumpectomy) AND ('surgery'/exp OR 'diagnosis, surgical' OR 'diagnostic techniques, surgical' OR 'operation' OR 'operation care' OR 'operative intervention' OR 'operative repair' OR 'operative restoration' OR 'operative surgical procedure' OR 'operative treatment' OR 'research surgery' OR 'resection' OR 'specialties, surgical' OR 'surgery' OR 'surgery, operative' OR 'surgical care' OR 'surgical correction' OR 'surgical exposure' OR 'surgical intervention' OR 'surgical management' OR 'surgical operation' OR 'surgical practice' OR 'surgical procedures, operative' OR 'surgical repair' OR 'surgical research' OR 'surgical restoration' OR 'surgical service' OR 'surgical speciality' OR 'surgical specialty' OR 'surgical therapy' OR 'surgical treatment') AND ('erector spinae muscle'/exp OR 'erector spinae muscle' OR 'musculus erector spinae' OR 'musculus sacrospinalis' OR 'sacrospinal muscle' OR 'sacrospinalis muscle') AND ('nerve block'/exp OR 'autonomic blocker' OR 'autonomic blocking' OR 'autonomic nerve block' OR 'autonomic nerve blocking' OR 'block, nerve' OR 'conduction block' OR 'maxillary nerve block' OR 'nerve block' OR 'nerve block anaesthesia' OR 'nerve block anesthesia' OR 'nerve blockade' OR 'nerve blocking' OR 'nerve conduction block' OR 'neurogenic blockade' OR 'sensory nerve block')
